# Supplementary material
Source: PubMed Central journal article supplement (PMC8569928)
Supplement: NIHMS1742023-supplement-010082_-_Supplemental_Material.pdf [file NIHMS1742023-supplement-010082_-_Supplemental_Material.pdf]

**SUPPLEMENTAL MATERIAL**

**Supplemental Table I.** Oligonucleotide Primers Used to Amplify the 13 Exons of G<sub>s</sub>α.

| <b>Exon</b> | <b>Fragment size (bp)</b> | <b>Upstream primer</b>                | <b>Downstream primer</b>              |
|-------------|---------------------------|---------------------------------------|---------------------------------------|
| 1           | 347                       | 5'-TCC-TGC-TCT-GGT-CCG-CCT-GC-3'      | 5'-CTG-CGC-CTT-CTC-CTC-GTT-GC-3'      |
|             | 141                       | 5'-CCG-CCA-TGG-GCT-GCC-TCG-GGA-A-3'   | 5'-CCC-GCC-CGC-CCT-TAC-CCA-GCA-3'     |
| 2           | 224                       | 5'-ACA-ACA-GCA-GAC-CTC-CCT -3'        | 5'-GCC-CAC-CTA-TAC-TTC-CTA-AA-3'      |
| 3           | 217                       | 5'-CTC-TTG-GCT-TGA-TGG-TTG-A-3'       | 5'-CCT-CAG-TTT-CCC-AGT-ATG-A-3'       |
| 4/5         | 361                       | 5'-CTG-ACA-TGG-TGC-AAT-ATG-AT-3'      | 5'-ACA-CTG-TGC-TCA-GGG-TTT-G-3'       |
| 6           | 199                       | 5'-ACT-CTG-GTC-TCA-GGG-TTT-G-3'       | 5'-GGG-TGG-CGG-TTA-CTT-ACT-3'         |
| 7/8*        | 345                       | 5'-GCG-CTG-TGA-ACA-CCC-CAC-GTG-TCT-3' | 5'-GAA-ACC-ATG-ATC-TCT-GTT-AT-3'      |
| 9/10*       | 347                       | 5'-CTC-TGG-AAT-AAC-CAG-CTG-TCC-TC-3'  | 5'-CGC-AGG-GGG-TGG-GCG-GTC-ACT-CCA-3' |
| 11*         | 212                       | 5'-CCT-GGC-CGA-AAG-CGC-GCT-TCT-3'     | 5'-AGC-CAG-CAA-GAG-TGG-AAG-CC-3'      |
| 12*         | 293                       | 5'-GGA-GCT-ACA-GAG-ATG-CTA-GC-3'      | 5'-AGT-AAA-TTT-ACA-TCC-ATG-AGA-3'     |
| 13*         | 322                       | 5'-TGG-ATT-TGA-GCT-CTT-TGC-GC-3'      | 5'-TAA-TTA-AAT-TTG-GGG-GTT-CC-3'      |

\* Primers previously reported<sup>9</sup>
